# Supplementary material for: COVID-19 Whole-Genome Resequencing with Redundant Tiling PCR and Subtract-Based Amplicon Normalization Successfully Characterized SARS-CoV-2 Variants in Clinical Specimens
Source: Hindawi journal article supplement (doi:10.1155/2022/2109641), 2022-09-28
Supplement: f1 [file 2109641.f1.pdf]

Supplemental Table 1. Primer sequences for tiling PCR  
The start, end, and strand columns show a 0-indexed bed formatted position  
in the Wuhan-Hu-1 reference SARS-CoV-2 genome.

| name | 5' to 3' sequence        | multiplex PCR group | biotinylated primer rate | Amplicon Name | start | end  | strand |
|------|--------------------------|---------------------|--------------------------|---------------|-------|------|--------|
| 000F | ACCAACCAACTTTCGATCTCTTG  | #1                  | 0.99                     | region_000    | 30    | 53   | +      |
| 000R | CGAGCATCCGAACGTTTGATG    | #1                  | 0                        | region_000    | 474   | 495  | -      |
| 001F | ATCTAGGTTTCGTCCGGGTG     | #2                  | 0.99                     | region_001    | 230   | 250  | +      |
| 001R | CCGTAACATATGGCCACCAGC    | #2                  | 0                        | region_001    | 655   | 675  | -      |
| 002F | TGGCACTTGTGGCTTAGTAG     | #3                  | 0                        | region_002    | 408   | 428  | +      |
| 002R | GTCTTTAATGCACTCAAGAGGG   | #3                  | 0                        | region_002    | 852   | 874  | -      |
| 003F | CAGTGGCTTACCGCAAGGTTC    | #1                  | 0                        | region_003    | 608   | 629  | +      |
| 003R | ACATCCCCATTGAAGGTGTC     | #1                  | 0                        | region_003    | 1054  | 1075 | -      |
| 004F | AGGGGCATACACTCGCTATG     | #2                  | 0.99                     | region_004    | 801   | 821  | +      |
| 004R | TAACAAAATCGCCCGTCTGC     | #2                  | 0                        | region_004    | 1257  | 1277 | -      |
| 005F | AGAGCTATGAATTGCAGACACC   | #3                  | 0.99                     | region_005    | 1004  | 1026 | +      |
| 005R | ATAGTGCAGACCACCCTTACG    | #3                  | 0                        | region_005    | 1456  | 1476 | -      |
| 006F | CAACCAAATGTGCCTTTCAAC    | #1                  | 0                        | region_006    | 1200  | 1221 | +      |
| 006R | ATGCCAAAATAATGGCGATCTC   | #1                  | 0                        | region_006    | 1678  | 1700 | -      |
| 007F | ACCTGAGCATAGTCTTGCCG     | #2                  | 0                        | region_007    | 1401  | 1421 | +      |
| 007R | AACACGAGCAGCCTCTGATG     | #2                  | 0                        | region_007    | 1874  | 1894 | -      |
| 008F | ACTCCAAAAGAGAAAGTCAACATC | #3                  | 0                        | region_008    | 1623  | 1648 | +      |
| 008R | CACCACCTGTAATGTAGGCC     | #3                  | 0                        | region_008    | 2058  | 2078 | -      |
| 009F | GGTGCCTGGAATATTGGTGAAC   | #1                  | 0                        | region_009    | 1819  | 1841 | +      |
| 009R | AGAATGTCTGAACACTCTCC     | #1                  | 0                        | region_009    | 2280  | 2300 | -      |
| 010F | ATGTTACATCTGATTTGGCTAC   | #2                  | 0                        | region_010    | 2017  | 2040 | +      |
| 010R | TTTCTTTTGGGGCTTTTAGAGG   | #2                  | 0                        | region_010    | 2458  | 2480 | -      |
| 011F | GCTTGTGAAATTGTCGGTGG     | #3                  | 0                        | region_011    | 2230  | 2250 | +      |
| 011R | CCATCATATTAGGTGCAAGGGC   | #3                  | 0                        | region_011    | 2665  | 2687 | -      |
| 012F | TFAAATCCAGAGAAGAACTGG    | #1                  | 0                        | region_012    | 2426  | 2448 | +      |
| 012R | GCATCTGCCACAACACAGG      | #1                  | 0                        | region_012    | 2879  | 2898 | -      |
| 013F | TATGTTGCTCGAAATCAAAGAC   | #2                  | 0                        | region_013    | 2628  | 2650 | +      |
| 013R | TGGCTCAAACCTCTTCTTCAC    | #2                  | 0                        | region_013    | 3071  | 3094 | -      |
| 014F | ACTTAATGAGAAGTGCTCTGC    | #3                  | 0                        | region_014    | 2820  | 2841 | +      |
| 014R | AATTGAGGTTGAACCTCAAC     | #3                  | 0                        | region_014    | 3280  | 3300 | -      |
| 015F | TGTTCTTTCTACCTCCAGATG    | #1                  | 0                        | region_015    | 3028  | 3050 | +      |
| 015R | CCTGCAACACCTCCTCCATG     | #1                  | 0                        | region_015    | 3463  | 3483 | -      |
| 016F | GGTCAACAAGACGGCAGTGAG    | #2                  | 0                        | region_016    | 3229  | 3250 | +      |
| 016R | CGTGCTGATTAATTTTCATAAGC  | #2                  | 0                        | region_016    | 3664  | 3689 | -      |
| 017F | CAGTGGTTGTTAATGCAGCC     | #3                  | 0.99                     | region_017    | 3428  | 3448 | +      |
| 017R | AGGAATCTCAGCGATCTTTGTTC  | #3                  | 0                        | region_017    | 3862  | 3886 | -      |
| 018F | TCATGTTGTCGGCCAAATG      | #1                  | 0.99                     | region_018    | 3609  | 3629 | +      |
| 018R | AGAGTGGCAGAATCTGGATG     | #1                  | 0                        | region_018    | 4054  | 4074 | -      |
| 019F | TCAAGCTTTTTGGAAATGAAGAG  | #2                  | 0                        | region_019    | 3826  | 3849 | +      |

|      |                           |    |   |            |      |      |   |
|------|---------------------------|----|---|------------|------|------|---|
| 019R | AACCATTTAAACCCTGACCC      | #2 | 0 | region_019 | 4254 | 4274 | - |
| 020F | GTCCTCACAGAAAACCTGTTAC    | #3 | 0 | region_020 | 4005 | 4028 | + |
| 020R | CGCTGTATAGTTGAAACTATGGC   | #3 | 0 | region_020 | 4453 | 4476 | - |
| 021F | GCCAACAGACAATTATATAACCAC  | #1 | 0 | region_021 | 4224 | 4248 | + |
| 021R | CAGAACTGTAGCTGGCACTT      | #1 | 0 | region_021 | 4673 | 4694 | - |
| 022F | AATGCCTGTCTGTGTGGAAAC     | #2 | 0 | region_022 | 4428 | 4449 | + |
| 022R | GGAATGTGGTAGGATTACTAGTG   | #2 | 0 | region_022 | 4875 | 4898 | - |
| 023F | CACTTGGCTATGTAACACATGG    | #3 | 0 | region_023 | 4610 | 4632 | + |
| 023R | ACATCAGCTCCATCCAAATAAGTTG | #3 | 0 | region_023 | 5051 | 5076 | - |
| 024F | CTGACAATCTACACAACCTAGG    | #1 | 0 | region_024 | 4814 | 4836 | + |
| 024R | CAGTGGCAAGATAACAGTTG      | #1 | 0 | region_024 | 5280 | 5300 | - |
| 025F | GCAAGTTGTGGACATGTCAATG    | #2 | 0 | region_025 | 5007 | 5029 | + |
| 025R | TGGCATGTTGAAACAAGTAACTC   | #2 | 0 | region_025 | 5460 | 5483 | - |
| 026F | ACATGTCAGCATTAAATCACAC    | #3 | 0 | region_026 | 5201 | 5223 | + |
| 026R | GGTGGTGCTGACATCATAAC      | #3 | 0 | region_026 | 5677 | 5697 | - |
| 027F | AGACAGTAGGTGAGTTAGGTGATG  | #1 | 0 | region_027 | 5423 | 5447 | + |
| 027R | TGGTTGTTGTGTAAGTGTTC      | #1 | 0 | region_027 | 5872 | 5894 | - |
| 028F | AGGTGTTAGATACCTTGTACG     | #2 | 0 | region_028 | 5607 | 5629 | + |
| 028R | AGTAACTGGTTAAATCATC       | #2 | 0 | region_028 | 6079 | 6100 | - |
| 029F | CGGTGCTTTACTTACAAAGTCCTC  | #3 | 0 | region_029 | 5811 | 5835 | + |
| 029R | TATACGTGGCTTTATTAGTTGC    | #3 | 0 | region_029 | 6253 | 6275 | - |
| 030F | CATATCCAAACGCAAGCTTCG     | #1 | 0 | region_030 | 6020 | 6041 | + |
| 030R | TGTCTCTACAACCTCGGTAG      | #1 | 0 | region_030 | 6467 | 6488 | - |
| 031F | ACCTATTGTTTGGCATGTAAAC    | #2 | 0 | region_031 | 6228 | 6250 | + |
| 031R | GCTATAGTATCCCAAGGGACAC    | #2 | 0 | region_031 | 6659 | 6681 | - |
| 032F | AGAAGTAGTGGAAATCCTACC     | #3 | 0 | region_032 | 6411 | 6433 | + |
| 032R | CGACACTCTTAACAGTATTCTTTGC | #3 | 0 | region_032 | 6859 | 6884 | - |
| 033F | CCCTTGCTACTCATGGTTTAGC    | #1 | 0 | region_033 | 6626 | 6648 | + |
| 033R | GCCTTCTCTGTAACCAGTAC      | #1 | 0 | region_033 | 7052 | 7072 | - |
| 034F | TAGAATTAAGCATCTATGCCG     | #2 | 0 | region_034 | 6828 | 6850 | + |
| 034R | GCAGCCAATCCAAGTACATAG     | #2 | 0 | region_034 | 7278 | 7299 | - |
| 035F | GCTGCTTAGGTGTTTAATGTC     | #3 | 0 | region_035 | 7006 | 7029 | + |
| 035R | CAACCGTCTACAACATGCAC      | #3 | 0 | region_035 | 7456 | 7476 | - |
| 036F | ATGGGATTTAACTGCTTTTGGC    | #1 | 0 | region_036 | 7209 | 7231 | + |
| 036R | TTAACTGTAGTGACAAGTCTC     | #1 | 0 | region_036 | 7676 | 7698 | - |
| 037F | ATGTACATCTTCTTTGCATC      | #2 | 0 | region_037 | 7411 | 7431 | + |
| 037R | CTATAACATTAATAGGCAATGAACC | #2 | 0 | region_037 | 7864 | 7889 | - |
| 038F | TGTGATACATTCTGTGCTGGTAG   | #3 | 0 | region_038 | 7627 | 7650 | + |
| 038R | TGTTTTGAGTTTTTCCATTGGTACG | #3 | 0 | region_038 | 8073 | 8098 | - |
| 039F | GTAACTTAGACAACCTGAGAG     | #1 | 0 | region_039 | 7828 | 7850 | + |
| 039R | ACAACTATCGCCAGTAACTTC     | #1 | 0 | region_039 | 8254 | 8275 | - |
| 040F | TGTTGGTGATAGTGC GGAAG     | #2 | 0 | region_040 | 8001 | 8021 | + |
| 040R | TTATTCTTTTAGCAGCACTACG    | #2 | 0 | region_040 | 8452 | 8475 | - |
| 041F | GTTGATTCAGATGTAGAACTAAAG  | #3 | 0 | region_041 | 8188 | 8213 | + |
| 041R | GAGTGACACCACCATCAATAGCC   | #3 | 0 | region_041 | 8694 | 8717 | - |
| 042F | AAAGTCACAACATTGCTTTG      | #1 | 0 | region_042 | 8378 | 8398 | + |
| 042R | GTAAGAAATGCAAAAAGTCACC    | #1 | 0 | region_042 | 8899 | 8921 | - |
| 043F | CTTGTGTTCTTTTGTGCTGC      | #2 | 0 | region_043 | 8596 | 8619 | + |
| 043R | AACTTTCATAAGCAACAGAACC    | #2 | 0 | region_043 | 9085 | 9107 | - |
| 044F | GCCCATTGATTGCTGCAGTC      | #3 | 0 | region_044 | 8816 | 8836 | + |
| 044R | CCATCTACCACTAGTAGATACAC   | #3 | 0 | region_044 | 9254 | 9277 | - |

|      |                          |    |      |            |       |       |   |
|------|--------------------------|----|------|------------|-------|-------|---|
| 045F | TGTGTTTTGGCTGCTGAATG     | #1 | 0.99 | region_045 | 9001  | 9021  | + |
| 045R | CACCAAAAGCTCTTCTAAACCTC  | #1 | 0    | region_045 | 9459  | 9482  | - |
| 046F | GAGTACTGTAGGCACGGCAC     | #2 | 0    | region_046 | 9208  | 9228  | + |
| 046R | GTACTAAAGGTGTGAACATAACC  | #2 | 0    | region_046 | 9651  | 9674  | - |
| 047F | GCTGGTGGTATTGTAGCTATCG   | #3 | 0    | region_047 | 9409  | 9431  | + |
| 047R | TGCGTAAGAGGTAATAGCAC     | #3 | 0    | region_047 | 9853  | 9873  | - |
| 048F | CTAATGATGTTTTCTTTTTAGCAC | #1 | 0    | region_048 | 9614  | 9638  | + |
| 048R | GCCATTTTTCTAAAACCACTCTGC | #1 | 0    | region_048 | 10050 | 10074 | - |
| 049F | CTGTGCACCTTTTTGTAAATAAAG | #2 | 0    | region_049 | 9802  | 9827  | + |
| 049R | CATAGAATGTCCAATAACCCTGAG | #2 | 0    | region_049 | 10276 | 10300 | - |
| 050F | ACAAACCTCTATCACCTCAGCTG  | #3 | 0    | region_050 | 10023 | 10046 | + |
| 050R | CCAACACTACCACATGAACC     | #3 | 0    | region_050 | 10480 | 10500 | - |
| 051F | ATGAAGATTACTCATTCGTAAGTC | #1 | 0    | region_051 | 10214 | 10239 | + |
| 051R | AACAGCAGCGTACAACCAAGC    | #1 | 0    | region_051 | 10669 | 10690 | - |
| 052F | ACCAATGTGCTATGAGGCC      | #2 | 0.99 | region_052 | 10430 | 10450 | + |
| 052R | CGTCCATTCATACCATTTGCAG   | #2 | 0    | region_052 | 10867 | 10890 | - |
| 053F | TTTGTTGACAGGCAAACAGC     | #3 | 0.99 | region_053 | 10606 | 10626 | + |
| 053R | AACAAAGACCATTGAGTACTCTG  | #3 | 0    | region_053 | 11050 | 11073 | - |
| 054F | TGCTCAAACCTGGAATTGCCG    | #1 | 0    | region_054 | 10815 | 10835 | + |
| 054R | TCAACCATATCCAACCATGTC    | #1 | 0    | region_054 | 11256 | 11277 | - |
| 055F | ACACCACTGGTTGTTACTCAC    | #2 | 0.99 | region_055 | 11001 | 11022 | + |
| 055R | AGAGCCCACATGGAAATGGC     | #2 | 0    | region_055 | 11452 | 11472 | - |
| 056F | CCTGCTAGTTGGGTGATGCG     | #3 | 0.99 | region_056 | 11230 | 11250 | + |
| 056R | CACCAAGAGTCAGTCTAAAGTAGC | #3 | 0    | region_056 | 11669 | 11693 | - |
| 057F | ATGTCTTGACACTCGTTTATAAAG | #1 | 0    | region_057 | 11402 | 11426 | + |
| 057R | AGAGTAAGACTACTGATGTGCAC  | #1 | 0    | region_057 | 11862 | 11885 | - |
| 058F | GCTAGTTTATTGTTTCTTAGG    | #2 | 0    | region_058 | 11604 | 11625 | + |
| 058R | GTAAGGTTGCCCTGTTGTCC     | #2 | 0    | region_058 | 12069 | 12089 | - |
| 059F | TCAAAGTAGCCACTGTACAGTC   | #3 | 0    | region_059 | 11822 | 11844 | + |
| 059R | TCAGCCATCTTTCCAACCTACG   | #3 | 0    | region_059 | 12259 | 12282 | - |
| 060F | CCATGCAGGGTGCTGTAGAC     | #1 | 0    | region_060 | 12023 | 12043 | + |
| 060R | ACCATTAGTTTGGCTGCTGTTG   | #1 | 0    | region_060 | 12458 | 12480 | - |
| 061F | GTGGCTAAATCTGAATTTGACCG  | #2 | 0.99 | region_061 | 12220 | 12243 | + |
| 061R | GCAGAATTGGCCCTTAAAGCTG   | #2 | 0    | region_061 | 12650 | 12672 | - |
| 062F | GCAAGAGATGGTTGTGTTCCC    | #3 | 0.99 | region_062 | 12418 | 12439 | + |
| 062R | TACCAGTTCCATCACTCTTAGGG  | #3 | 0    | region_062 | 12852 | 12875 | - |
| 063F | CACCTAATTTAGCATGGCCTC    | #1 | 0    | region_063 | 12620 | 12641 | + |
| 063R | AGCATCTACAGCAAAGCACAG    | #1 | 0    | region_063 | 13071 | 13093 | - |
| 064F | TGCACTGTTATCCGATTTACAGG  | #2 | 0.99 | region_064 | 12810 | 12833 | + |
| 064R | GATCTATGTGGCAACGGCAG     | #2 | 0    | region_064 | 13251 | 13271 | - |
| 065F | AATGCAACAGAAGTGCCTGC     | #3 | 0.99 | region_065 | 13030 | 13050 | + |
| 065R | CTGCACTTACACCGCAAACC     | #3 | 0    | region_065 | 13469 | 13489 | - |
| 066F | TCCTTTGGTGGTGCATCGTG     | #1 | 0.99 | region_066 | 13222 | 13242 | + |
| 066R | TGGTAGTTAGAGAAAGTGTGCTC  | #1 | 0    | region_066 | 13658 | 13682 | - |
| 067F | TTGTGATCAACTCCGCGAAC     | #2 | 0    | region_067 | 13410 | 13430 | + |
| 067R | CATCACAACAATTGTATGTGAC   | #2 | 0    | region_067 | 13878 | 13900 | - |
| 068F | CGCTTCCAAGAAAAGGACGAAG   | #3 | 0    | region_068 | 13602 | 13624 | + |
| 068R | ACCAGTTACCATTGAGATCTTG   | #3 | 0    | region_068 | 14067 | 14089 | - |
| 069F | TGGCAGACCTCGTCTATGC      | #1 | 0.99 | region_069 | 13810 | 13829 | + |
| 069R | AACCTCTCTCCGTGAAGTC      | #1 | 0    | region_069 | 14259 | 14279 | - |
| 070F | GATGCCATGCGAAATGCTGG     | #2 | 0.99 | region_070 | 14019 | 14039 | + |

|      |                           |    |      |            |       |       |   |
|------|---------------------------|----|------|------------|-------|-------|---|
| 070R | AGCTCTCTGAAGTGGTATCCAG    | #2 | 0    | region_070 | 14470 | 14492 | - |
| 071F | TGTTGACACTGACTTAACAAAGCC  | #3 | 0.99 | region_071 | 14207 | 14231 | + |
| 071R | CGGGTTTGACAGTTTGAAAAGC    | #3 | 0    | region_071 | 14655 | 14677 | - |
| 072F | CCACCTACAAGTTTTGGACCAC    | #1 | 0.99 | region_072 | 14403 | 14425 | + |
| 072R | GCCACCATCGTAACAATCAAAG    | #1 | 0    | region_072 | 14876 | 14898 | - |
| 073F | CGTGCTTTTCAGTAGCTGCAC     | #2 | 0.99 | region_073 | 14620 | 14641 | + |
| 073R | TGCACTAATGGCATACTTAAGATTC | #2 | 0    | region_073 | 15065 | 15090 | - |
| 074F | ACCAACAATGTGTGATATCAGAC   | #3 | 0    | region_074 | 14819 | 14842 | + |
| 074R | GGTGAGGGTTTTCTACATCAC     | #3 | 0    | region_074 | 15259 | 15280 | - |
| 075F | TGAGGATCAAGATGCACTTTTCG   | #1 | 0.99 | region_075 | 15002 | 15025 | + |
| 075R | AACATATAGTGAACCGCCACAC    | #1 | 0    | region_075 | 15443 | 15465 | - |
| 076F | AGCAAATTCTATGGTGGTTGGC    | #2 | 0.99 | region_076 | 15213 | 15235 | + |
| 076R | GCGTAAACTCATTCACAAAGTCTG  | #2 | 0    | region_076 | 15655 | 15680 | - |
| 077F | TCAAGTATTGAGTGAAATGGTC    | #3 | 0    | region_077 | 15419 | 15441 | + |
| 077R | ACTAGCATTGTATGTTGAGAGC    | #3 | 0    | region_077 | 15877 | 15899 | - |
| 078F | ACACAGACTTTATGAGTGTCTC    | #1 | 0    | region_078 | 15611 | 15633 | + |
| 078R | TGAAAGACATCAGCATACTCCTG   | #1 | 0    | region_078 | 16062 | 16085 | - |
| 079F | TGAAGCAAAATGTTGGACTGAGAC  | #2 | 0.99 | region_079 | 15824 | 15848 | + |
| 079R | ACGTATGCAAGCACCATC        | #2 | 0    | region_079 | 16279 | 16299 | - |
| 080F | GAACGGTTCGTGTCTTTAGC      | #3 | 0.99 | region_080 | 16008 | 16028 | + |
| 080R | AGCACACAATGGAAACTAATGGG   | #3 | 0    | region_080 | 16467 | 16491 | - |
| 081F | TGAGGCTATGTACACACCGC      | #1 | 0    | region_081 | 16202 | 16222 | + |
| 081R | GTTTAAATGTCTCCTCAGTAGC    | #1 | 0    | region_081 | 16653 | 16675 | - |
| 082F | TGTGACTCACTTTACTTAGGAGG   | #2 | 0.99 | region_082 | 16412 | 16436 | + |
| 082R | CTCGGTAAACAACAGCATCACC    | #2 | 0    | region_082 | 16851 | 16873 | - |
| 083F | AGCTTTTTGCAGCAGAAACGC     | #3 | 0.99 | region_083 | 16627 | 16648 | + |
| 083R | CTTACCAGTACCAGGTGGTCCC    | #3 | 0    | region_083 | 17078 | 17100 | - |
| 084F | AGTACACCTTTGAAAAAGGTGAC   | #1 | 0    | region_084 | 16825 | 16848 | + |
| 084R | CTGTTCTAATGTTGAATTCACTTTG | #1 | 0    | region_084 | 17273 | 17298 | - |
| 085F | CAGATGAGTTTTCTAGCAATGTTG  | #2 | 0    | region_085 | 17011 | 17035 | + |
| 085R | TGCCCTTAGTTAGCAATGTGC     | #2 | 0    | region_085 | 17461 | 17482 | - |
| 086F | GTAGAATTATACCTGCACGTGC    | #3 | 0    | region_086 | 17227 | 17249 | + |
| 086R | GCAGATGAAACATCATGCGTG     | #3 | 0    | region_086 | 17675 | 17696 | - |
| 087F | TGTGTACATTGGCGACCCTG      | #1 | 0    | region_087 | 17423 | 17443 | + |
| 087R | GCTGTTTCAGTGGTTTGAGTG     | #1 | 0    | region_087 | 17873 | 17894 | - |
| 088F | AAGCACATAAAGACAAATCAGC    | #2 | 0    | region_088 | 17620 | 17642 | + |
| 088R | AGGATGTAACCCAGTGATTACC    | #2 | 0    | region_088 | 18077 | 18099 | - |
| 089F | ACTGTTGATTCATCACAGGGC     | #3 | 0    | region_089 | 17829 | 17850 | + |
| 089R | GCTTCTTCGCGGGTGATAAAC     | #3 | 0    | region_089 | 18254 | 18275 | - |
| 090F | GGAATGTGGCACTTTACAAGC     | #1 | 0.99 | region_090 | 18019 | 18041 | + |
| 090R | AAATTGATCTCCAGGCGGTG      | #1 | 0    | region_090 | 18457 | 18477 | - |
| 091F | ATTATCAAGTTAATGGTTACCC    | #2 | 0    | region_091 | 18226 | 18248 | + |
| 091R | GCAGTGGAAAAGCATGTGGC      | #2 | 0    | region_091 | 18678 | 18698 | - |
| 092F | CTACAGGTTATGTTGATACACC    | #3 | 0    | region_092 | 18400 | 18422 | + |
| 092R | AAGCACTCGTGGACAGCTAG      | #3 | 0    | region_092 | 18876 | 18896 | - |
| 093F | GTATTTTGTGAAAATAGGACCTG   | #1 | 0    | region_093 | 18626 | 18649 | + |
| 093R | TGCATCATAGAACTTCCATTCTAC  | #1 | 0    | region_093 | 19074 | 19098 | - |
| 094F | TCCATGGTAATGCACATGTAGC    | #2 | 0    | region_094 | 18826 | 18848 | + |
| 094R | CACCATCACAACCGGCAAG       | #2 | 0    | region_094 | 19268 | 19288 | - |
| 095F | TCTTCACGACATTGGTAACCC     | #3 | 0    | region_095 | 19022 | 19043 | + |
| 095R | GCACCACCTAAATTGCAACG      | #3 | 0    | region_095 | 19464 | 19484 | - |

|      |                           |    |      |            |       |       |   |
|------|---------------------------|----|------|------------|-------|-------|---|
| 096F | CCTGCTAATTCCATTGTTTGTAG   | #1 | 0    | region_096 | 19215 | 19238 | + |
| 096R | TGTTGTCCATCAAAGTGTCCTC    | #1 | 0    | region_096 | 19655 | 19676 | - |
| 097F | TCATGGAAAACAAGTAGTGTCAG   | #2 | 0    | region_097 | 19400 | 19423 | + |
| 097R | GAGCATCTCTTTGTAGTCCAG     | #2 | 0    | region_097 | 19874 | 19897 | - |
| 098F | ACTTCAGAGTTTAGAAAATGTGGC  | #3 | 0    | region_098 | 19613 | 19637 | + |
| 098R | AGCTTGTTTGGGACCTACAG      | #3 | 0    | region_098 | 20080 | 20100 | - |
| 099F | GCAACATTAAACCAGTACCAGAGG  | #1 | 0    | region_099 | 19801 | 19825 | + |
| 099R | CCGTTCAATGAATTCATCCATAGC  | #1 | 0    | region_099 | 20268 | 20292 | - |
| 100F | TAGAAATGCCCGTAATGGTGTTT   | #2 | 0.99 | region_100 | 20021 | 20044 | + |
| 100R | ATGAACCTGTTTGCGCATCTG     | #2 | 0    | region_100 | 20461 | 20482 | - |
| 101F | GAATTTAAACCCAGGAGTCAAATGG | #3 | 0.99 | region_101 | 20223 | 20248 | + |
| 101R | GTTGCCACGCTTGACTAGATTG    | #3 | 0    | region_101 | 20655 | 20677 | - |
| 102F | GATTTTATTCTATGGACAGTACAG  | #1 | 0    | region_102 | 20418 | 20443 | + |
| 102R | GGTGCAACTCCTTTATCAGAACC   | #1 | 0    | region_102 | 20874 | 20897 | - |
| 103F | TGGTGTAAGATGGCCATGTAG     | #2 | 0    | region_103 | 20613 | 20635 | + |
| 103R | CATTTTAGTCTTAGGGTCGTAC    | #2 | 0    | region_103 | 21050 | 21073 | - |
| 104F | AACACATTAACTAGCTGTACCC    | #3 | 0    | region_104 | 20820 | 20844 | + |
| 104R | CCAATTAATAATGCTTCAGATGATG | #3 | 0    | region_104 | 21256 | 21281 | - |
| 105F | TAAATGGGATCTCATTATTAGTG   | #1 | 0    | region_105 | 21023 | 21046 | + |
| 105R | TAAAATCATATCATTGATTGACC   | #1 | 0    | region_105 | 21450 | 21474 | - |
| 106F | AACTTCGCATGGTGGACAG       | #2 | 0    | region_106 | 21212 | 21232 | + |
| 106R | TGTCAGGGTAATAAACACCACG    | #2 | 0    | region_106 | 21661 | 21683 | - |
| 107F | AAGGGGTACTGCTGTTATGTC     | #3 | 0.99 | region_107 | 21419 | 21440 | + |
| 107R | GTAGTACAAAAATCCAGCCTC     | #3 | 0    | region_107 | 21866 | 21888 | - |
| 108F | ACCAGAACTCAATTACCCCCTG    | #1 | 0.99 | region_108 | 21619 | 21641 | + |
| 108R | GGTCCATAAGAAAAGGCTGAGAG   | #1 | 0    | region_108 | 22074 | 22097 | - |
| 109F | GGTGTTTATTTGCTTCCACTGAG   | #2 | 0    | region_109 | 21826 | 21850 | + |
| 109R | GCAAGTAAAGTTTGAAACCTAGTG  | #2 | 0    | region_109 | 22266 | 22290 | - |
| 110F | TGGATGGAAAGTGAGTTCAGAG    | #3 | 0    | region_110 | 22015 | 22037 | + |
| 110R | ACAGTGAAGGATTTCAACGTACAC  | #3 | 0    | region_110 | 22461 | 22485 | - |
| 111F | CTCCCTCAGGGTTTTTCGGC      | #1 | 0    | region_111 | 22207 | 22227 | + |
| 111R | CTTAAAAGTGGAATGATGCGG     | #1 | 0    | region_111 | 22673 | 22696 | - |
| 112F | GGAACATTACAGATGCTGTAGAC   | #2 | 0.99 | region_112 | 22408 | 22432 | + |
| 112R | TTCCAAGCTATAACGCAGCC      | #2 | 0    | region_112 | 22852 | 22872 | - |
| 113F | CATCTGTTTATGCTTGAACAGG    | #3 | 0    | region_113 | 22604 | 22627 | + |
| 113R | GTACTIONACTCTGTATGGTTGG   | #3 | 0    | region_113 | 23076 | 23099 | - |
| 114F | GATTATAATTATAAATTACCAGATG | #1 | 0    | region_114 | 22819 | 22844 | + |
| 114R | GGATCACGGACAGCATCAGTAG    | #1 | 0    | region_114 | 23276 | 23298 | - |
| 115F | TGGTGTTGAAGGTTTAAATTGTTAC | #2 | 0    | region_115 | 23004 | 23029 | + |
| 115R | AGAACCTGTAGAATAAACACGCC   | #2 | 0    | region_115 | 23459 | 23482 | - |
| 116F | AGGCACAGGTGTTCTTACTGAG    | #3 | 0.99 | region_116 | 23202 | 23224 | + |
| 116R | AGCAACTGAATTTTCTGCACC     | #3 | 0    | region_116 | 23659 | 23680 | - |
| 117F | TGCACAGAAGTCCCTGTTGC      | #1 | 0    | region_117 | 23410 | 23430 | + |
| 117R | GCTATTCCAGTTAAAGCACGG     | #1 | 0    | region_117 | 23853 | 23874 | - |
| 118F | AGTCAATCCATCATTGCCTACAC   | #2 | 0.99 | region_118 | 23626 | 23649 | + |
| 118R | CCATATTGTTTGATGAAGCCAGC   | #2 | 0    | region_118 | 24052 | 24075 | - |
| 119F | ACTGAATGCAGCAATCTTTTG     | #3 | 0    | region_119 | 23800 | 23821 | + |
| 119R | ACCTATAAGCCATTTGCATAGC    | #3 | 0    | region_119 | 24256 | 24278 | - |
| 120F | TCAACAAAGTGACACTTGACAG    | #1 | 0.99 | region_120 | 24029 | 24050 | + |
| 120R | AACTTGAAATTGCACAAAATTG    | #1 | 0    | region_120 | 24465 | 24489 | - |
| 121F | CACTTCTGGTTGGACCTTTGG     | #2 | 0    | region_121 | 24207 | 24228 | + |

|      |                           |    |      |            |       |       |   |
|------|---------------------------|----|------|------------|-------|-------|---|
| 121R | TTGATTGTCCAAGTACACACTC    | #2 | 0    | region_121 | 24652 | 24674 | - |
| 122F | TGGTCAACCAAAATGCACAAGC    | #3 | 0.99 | region_122 | 24413 | 24435 | + |
| 122R | TGTGTTACAAACCAGTGTGTGC    | #3 | 0    | region_122 | 24857 | 24879 | - |
| 123F | AGCTGCAGAAATCAGAGCTTC     | #1 | 0.99 | region_123 | 24603 | 24624 | + |
| 123R | GCCAGAGATGTCACCTAAATCAAC  | #1 | 0    | region_123 | 25051 | 25075 | - |
| 124F | TCCTCGTGAAGGTGTCTTTG      | #2 | 0    | region_124 | 24828 | 24848 | + |
| 124R | GCCCTTGAGACAACCTACAGC     | #2 | 0    | region_124 | 25280 | 25300 | - |
| 125F | ATATTTTAAGAATCATACATCACC  | #3 | 0    | region_125 | 25023 | 25047 | + |
| 125R | CGGTATCGTTGCAGTAGCG       | #3 | 0    | region_125 | 25481 | 25500 | - |
| 126F | TGGCTTGATTGCCATAGTAATGG   | #1 | 0.99 | region_126 | 25227 | 25250 | + |
| 126R | CTTCAAGGCCAGCAGCAAC       | #1 | 0    | region_126 | 25680 | 25699 | - |
| 127F | TGGAAGTGAACCTTTGAAGCAAG   | #2 | 0    | region_127 | 25421 | 25444 | + |
| 127R | TTGAAGAAGTTACACTATTGTAAGG | #2 | 0    | region_127 | 25866 | 25891 | - |
| 128F | AGCACTCTCCAAGGGTGTTC      | #3 | 0.99 | region_128 | 25604 | 25624 | + |
| 128R | CATGTTCAACACCAGTGTCTG     | #3 | 0    | region_128 | 26053 | 26074 | - |
| 129F | GCCAACTATTTTCTTGCTGGC     | #1 | 0.99 | region_129 | 25818 | 25840 | + |
| 129R | CGTACCTGTCTCTCCGAAACG     | #1 | 0    | region_129 | 26255 | 26277 | - |
| 130F | CACTTCAGACTATTACCAGCTG    | #2 | 0    | region_130 | 26012 | 26034 | + |
| 130R | CGTTTAGACCAGAAGATCAGGAAC  | #2 | 0    | region_130 | 26451 | 26475 | - |
| 131F | GCACAAGCTGATGAGTACGAAC    | #3 | 0.99 | region_131 | 26220 | 26242 | + |
| 131R | CCATAACAGCCAGAGGAAAATTAAC | #3 | 0    | region_131 | 26671 | 26696 | - |
| 132F | ACCTTCTTTTACGTTTACTCTCG   | #1 | 0    | region_132 | 26402 | 26426 | + |
| 132R | TGGAGTGGCACGTTGAGAAG      | #1 | 0    | region_132 | 26876 | 26896 | - |
| 133F | ACAATTTGCCTATGCCAACAGG    | #2 | 0.99 | region_133 | 26626 | 26648 | + |
| 133R | AGTCACCTGCTACACGCTG       | #2 | 0    | region_133 | 27074 | 27093 | - |
| 134F | TCAGACTGTTTGC GCGTACG     | #3 | 0    | region_134 | 26820 | 26840 | + |
| 134R | CCAAATGGAACTTTAAAAGTCCTC  | #3 | 0    | region_134 | 27257 | 27282 | - |
| 135F | TGTTGCTACATCACGAACGC      | #1 | 0.99 | region_135 | 27028 | 27048 | + |
| 135R | TTGTACCTCTAACACACTCTTGG   | #1 | 0    | region_135 | 27452 | 27475 | - |
| 136F | GTTTCATCTCGTTGACTTTCAGG   | #2 | 0    | region_136 | 27203 | 27226 | + |
| 136R | AGTTCTTGAACCTCCTCTGTCTG   | #2 | 0    | region_136 | 27656 | 27680 | - |
| 137F | TTGGCACTGATAACACTCGC      | #3 | 0.99 | region_137 | 27411 | 27431 | + |
| 137R | TCGTTTAGGCGTGACAAGTTTC    | #3 | 0    | region_137 | 27869 | 27891 | - |
| 138F | CGTGCCAGATCAGTTTCACC      | #1 | 0.99 | region_138 | 27624 | 27644 | + |
| 138R | GCCTCATCCACGCACAATTC      | #1 | 0    | region_138 | 28067 | 28087 | - |
| 139F | TGCTTATTATCTTTTGGTTCTCAC  | #2 | 0    | region_139 | 27825 | 27849 | + |
| 139R | CAGACATTTTAGTTTGTTGTTTAG  | #2 | 0    | region_139 | 28255 | 28280 | - |
| 140F | AATGGTATATTAGAGTAGGAGCTAG | #3 | 0    | region_140 | 28023 | 28048 | + |
| 140R | GAACGCCTTGTCCTCGAGGG      | #3 | 0    | region_140 | 28470 | 28490 | - |
| 141F | TCATGACGTTCTGTGTTTITAG    | #1 | 0.99 | region_141 | 28225 | 28248 | + |
| 141R | AGGCTCCCTCAGTTGCAAC       | #1 | 0    | region_141 | 28669 | 28688 | - |
| 142F | TTGGTTCACCGCTCTCACTC      | #2 | 0.99 | region_142 | 28425 | 28445 | + |
| 142R | CCTACTGCTGCCTGGAGTTG      | #2 | 0    | region_142 | 28862 | 28882 | - |
| 143F | GCTGGACTTCCCTATGGTGC      | #3 | 0.99 | region_143 | 28627 | 28647 | + |
| 143R | CTGCCGAAAGCTTGTGTTAC      | #3 | 0    | region_143 | 29080 | 29100 | - |
| 144F | CAAGCCTCTTCTCGTTCCTC      | #1 | 0.99 | region_144 | 28813 | 28833 | + |
| 144R | GTAGGTCAACCACGTTCCCG      | #1 | 0    | region_144 | 29252 | 29272 | - |
| 145F | AAATCTGCTGCTGAGGCTTC      | #2 | 0    | region_145 | 29017 | 29037 | + |
| 145R | CCAAATCTGCAGCAGGAAGAAG    | #2 | 0    | region_145 | 29452 | 29474 | - |
| 146F | CGCATTTGGCATGGAAGTCAC     | #3 | 0    | region_146 | 29227 | 29247 | + |
| 146R | CACACTGATTAAAGATTGCTATGTG | #3 | 0    | region_146 | 29667 | 29692 | - |

|      |                          |    |   |            |       |       |   |
|------|--------------------------|----|---|------------|-------|-------|---|
| 147F | GCCTTACCGCAGAGACAGAAG    | #1 | 0 | region_147 | 29413 | 29434 | + |
| 147R | TTTTTTTTTTTTTTTGTCTTCTCC | #1 | 0 | region_147 | 29860 | 29885 | - |
